# Supplementary material
Source: publisher figshare collection journal article supplement (https://frontiersin.figshare.com/ndownloader/files/31578050)

**Supplementary materials**

**Interactive effects of microplastics and tetracycline on bioaccumulation and biochemical status in the Jian carp (*Cyprinus carpio* var. Jian)**

Chaonan Zhang1,2,3, Qiujie Wang1, Zhiheng Zuo1, Jianhua Ding4, Guohuan Xu3*, Jixing Zou1,2**

1Joint Laboratory of Guangdong Province and Hong Kong Region on Marine Bioresource Conservation and Exploitation, College of Marine Sciences, South China Agricultural University, Guangzhou 510642, China

2Guangdong Laboratory for Lingnan Modern Agriculture, South China Agricultural University, Guangzhou 510642, China

3State Key Laboratory of Applied Microbiology Southern China, Guangdong Provincial Key Laboratory of Microbial Culture Collection and Application, Institute of Microbiology, Guangdong Academy of Sciences, Guangzhou 510070, China

4Guangzhou Liyang Aqua-Technology CO., LTD; Aquaculture Environmental Improvement Engineering Technology Research Center of Guangdong Province, Guangzhou 510070, China

Correspondence authors:

*xghfish@163.com (G. Xu);

**zoujixing@scau.edu.cn (J. Zou).

**Supplementary text 1.** **Details of experimental methods of RNA extraction and cDNA synthesis**

Total RNA was extracted using AG RNAex Pro Rreagent (Accurate Biotechnology Co., Ltd, Hunan, China) following the manufacturer’s protocol. RNA quality was assessed by electrophoresis on a 1.0% agarose gel and its concentration was tested by mySPEC (VWR, Radnor, PA, USA). 1 μg total RNA was purified and the first-strand cDNA was synthesized using Evo M-ML RT Kit with gDNA Clean for qPCR (Accurate Biotechnology Co., Ltd, Hunan, China) according to the manufacturer’s instructions.

**Supplementary text 2. Details of the RT-PCR materials and program**

The real-time PCR assay was carried out using CFX Connect Real-Time System (Bio-Rad, CA, USA) and AG™ SYBR Green Premix Pro Taq HS qPCR Kit (Accurate Biotechnology Co., Ltd, Hunan, China) following the manufacturer’s recommendations. The real-time PCR program was set at 30 s for 95 ℃, followed by 40 cycles of 95℃ for 5 s, 60 ℃ for 30 s. Melting curves were obtained by increasing the temperature from 60 to 95℃ (0.5℃/s) to denature the double-stranded DNA. Each amplification reaction was run in triplicate. After finishing the program, the threshold cycle (Ct) values were obtained from each sample. Relative gene expression levels were evaluated using 2−ΔΔCT method. Bio-Rad CFX Maestro 1.0 version 4.0.2325.0418 was used for data collection.

**Supplementary text 3. Details of the specific method of IBR calculation**

The basis of the calculation is described here briefly. For each biomarker: (1) Calculation of mean and SD for each station. (2) Standardisation of data for each station: χ' i = (χi – mean χ) / s, where χ'i = standardized value of the biomarker, χi = mean value of a biomarker from each station, mean χ is the mean of the biomarker calculated for all the stations, and s = standard deviation calculated for the station-specific values of each biomarker. Result: variance = 1, mean = 0. (3) Using standardised data, addition of the value obtained for each station to the absolute (=non-negative) value of the minimum value in the data set: B = χ' i +│χmin│. Result: adjusts the lowest value in the set to zero. For all the biomarkers treated this way: (4) calculation of Star Plot areas by multiplication of the obtained value of each biomarker (Bi) with the value of the next biomarker, arranged as a set, dividing each calculation by 2 and (5) summing-up of all values: {[(B1· B2)/2] + [(B2· B3)/2] + … [(Bn-1· Bn)/2]}. Result: IBR (average of different arrangements of biomarkers in the set).

**Supplementary figure 1.** Bar graph presentation of TC concentration variation in liver of Jian carp treated with various exposure treatments of TC group and TC+MPs group during 48 h and 96 h exposure.


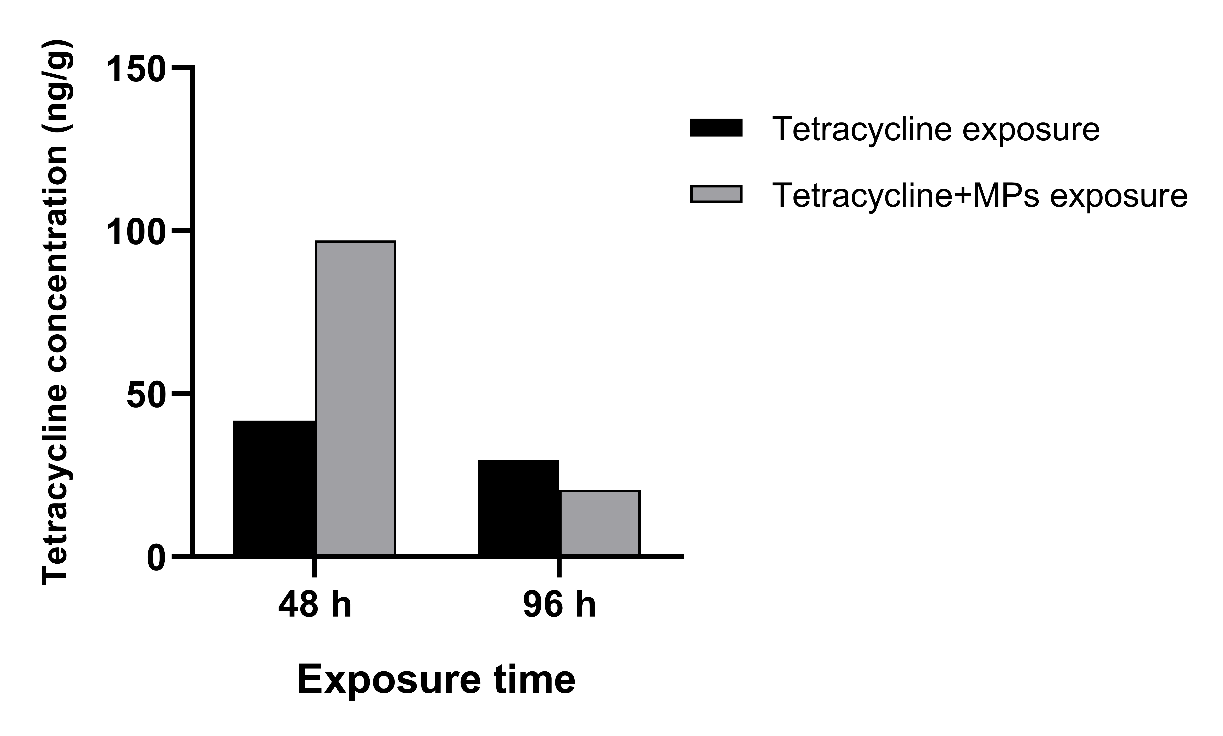

Supplement: Supplementary file 1 [file 31578050]
